# Supplementary material for: Ophthalmomyiasis Externa and Importance of Risk Factors, Clinical Manifestations, and Diagnosis: Review of the Medical Literature
Source: MDPI journal article supplement (doi:10.3390/diseases11040180), 2023-12-11
Supplement: s1 [file s1]

**Supplementary Table S1.** General characteristics and clinical pictures of external ophthalmomyiasis cases reported from 2000 to 2022.

| Author (year)              | Country       | Sex | Age | Activity    | Cause                                     | Symptoms                                            | Location                      | Examination                                                                               | Agent                     |
|----------------------------|---------------|-----|-----|-------------|-------------------------------------------|-----------------------------------------------------|-------------------------------|-------------------------------------------------------------------------------------------|---------------------------|
| Weinand et al. 2001 [108]  | Germany       | M   | 28  |             | Something strikes the eye (autochthonous) | Foreign body sensation                              | Left                          | Conjunctival hyperemia, presence of mobile larvae                                         | <i>Oestrus ovis</i>       |
| Emborsky et al. 2002 [113] | USA           | M   | 4   |             |                                           | Swelling and papules on lower and upper left eyelid | Left                          | Presence of three papules and a whitish, eyelid edema and hyperemia, mobile foreign body. | <i>Dermatobia hominis</i> |
| Sigauke et al 2003 [14]    | USA           | F   | 16  | Student     |                                           | Pain, mucoid discharge                              | Both eyes                     | Conjunctival follicular reaction                                                          | No                        |
| Denion et al 2004 [17]     | Brazil        | M   | 25  |             |                                           |                                                     | Eyelid (right upper)          | Furuncular blepharitis                                                                    | <i>Dermatobia hominis</i> |
|                            | French Guiana | F   | 1   |             |                                           |                                                     | Eyelid (right lower)          | Edema and pore near the inner canthus                                                     | <i>Dermatobia hominis</i> |
|                            | French Guiana | F   | 3   |             |                                           |                                                     | Eyelid (left upper and lower) | Movements observed in the dome-shaped lesion.                                             | <i>Dermatobia hominis</i> |
|                            | French Guiana | M   | 39  | Gold washer |                                           | Pain, writhing sensation                            | Eyelid (right upper)          | Serosanguinous and purulent discharge after larval death.                                 | <i>Dermatobia hominis</i> |
|                            | French Guiana | M   | 3   |             |                                           | Pruritus                                            |                               | Palpebral edema, pore in the conjunctival fornix                                          | <i>Dermatobia hominis</i> |
|                            | French Guiana | M   | 13  |             |                                           | Stinging sensation, movements within the lesion     |                               | Intermittently protruding caruncle larvae                                                 | <i>Dermatobia hominis</i> |
|                            | French Guiana |     | 15  |             |                                           |                                                     | Eyelid (left upper)           | Dome-shaped lesion, Pore in free margin                                                   | <i>Dermatobia hominis</i> |
|                            | French Guiana |     | 1   |             |                                           |                                                     | Eyelid (right upper)          | Erythema and moderate edema around the pore                                               | <i>Dermatobia hominis</i> |
|                            | French Guiana | M   | 45  |             |                                           |                                                     | Eyelid (right upper)          | Bloody discharge, Edema, Pore in thickened free margin                                    | <i>Dermatobia hominis</i> |
| Gregory et al. 2004 [58]   | Iraq          | M   | 20  | US Soldier  |                                           | Foreign body sensation, watery                      | Left                          | Conjunctival congestion, chemosis,                                                        | <i>Oestrus ovis</i>       |

|                             |          |   |    |                                  |                                  |                                                                                        |       |                                                                                                |                               |
|-----------------------------|----------|---|----|----------------------------------|----------------------------------|----------------------------------------------------------------------------------------|-------|------------------------------------------------------------------------------------------------|-------------------------------|
|                             |          |   |    |                                  |                                  | eyes,<br>photophobia                                                                   |       | periorbital edema<br>and erythema                                                              |                               |
| Masoudi et al.<br>2004 [75] | Iran     | M | 15 |                                  |                                  | Foreign body<br>sensation, watery<br>eyes, pruritus,<br>eye redness,<br>swelling       |       | Presence of mobile<br>larvae, chemosis                                                         | <i>Oestrus ovis</i>           |
|                             | Iran     | M | 18 |                                  |                                  | Foreign body<br>sensation, watery<br>eyes, pruritus,<br>eye redness, pain,<br>swelling |       | Presence of mobile<br>larvae, chemosis                                                         | <i>Oestrus ovis</i>           |
|                             | Iran     | M | 24 |                                  |                                  | Foreign body<br>sensation, watery<br>eyes, pain,<br>swelling,<br>chemosis              |       | Presence of mobile<br>larvae, chemosis                                                         | <i>Oestrus ovis</i>           |
|                             | Iran     | M | 27 |                                  |                                  | Foreign body<br>sensation, watery<br>eyes, pruritus,<br>eye redness,<br>swelling       |       | Presence of mobile<br>larvae, chemosis                                                         | <i>Oestrus ovis</i>           |
|                             | Iran     | M | 34 |                                  |                                  | Foreign body<br>sensation, watery<br>eyes, pruritus,<br>eye redness,<br>swelling       |       | Presence of mobile<br>larvae, chemosis                                                         | <i>Oestrus ovis</i>           |
|                             | Iran     | M | 36 |                                  |                                  | Watery eyes,<br>pruritus, eye<br>redness, swelling                                     |       | Presence of mobile<br>larvae, chemosis,<br>rhinorrhea                                          | <i>Oestrus ovis</i>           |
|                             | Iran     | F | 41 |                                  |                                  | Foreign body<br>sensation, watery<br>eyes, pruritus,<br>eye redness,<br>swelling       |       | Presence of mobile<br>larvae, chemosis                                                         | <i>Oestrus ovis</i>           |
|                             | Iran     | M | 56 |                                  |                                  | Foreign body<br>sensation, watery<br>eyes, pruritus,<br>eye redness, pain,<br>swelling |       | Presence of mobile<br>larvae, chemosis                                                         | <i>Oestrus ovis</i>           |
| Levett et al.<br>2004 [56]  | Barbados | F | 55 |                                  |                                  | Foreign body<br>sensation,<br>rhinorrhea,<br>sneezing                                  | Right | Presence of mobile<br>larvae                                                                   | <i>Oestrus ovis</i>           |
| Ashenhurst<br>(2004) [55]   | Canada   | F | 50 | Tourist<br>traveled to<br>Belize | Insect bite in the<br>eye        | Pain, periorbital<br>erythema, edema<br>of the lower<br>eyelid                         | Left  | Fistulous tract of<br>erythema with<br>periorbital edema<br>around the lower<br>eyelid region. | <i>Dermatobia<br/>hominis</i> |
| Dono et al.<br>2005 [45]    | Italy    | M |    |                                  | Insect flying<br>around the face | Foreign body<br>sensation,                                                             |       |                                                                                                | <i>Oestrus ovis</i>           |

|                                |          |   |    |                      |                                                                      |                                                                                                           |       |                                                                                                                            |                                    |
|--------------------------------|----------|---|----|----------------------|----------------------------------------------------------------------|-----------------------------------------------------------------------------------------------------------|-------|----------------------------------------------------------------------------------------------------------------------------|------------------------------------|
|                                |          |   |    |                      |                                                                      | pruritus, pain,<br>burning eye                                                                            |       |                                                                                                                            |                                    |
|                                | Italy    | M |    |                      | A sensation of<br>water drop entry                                   | Foreign body<br>sensation,<br>pruritus, pain,<br>burning eye                                              |       |                                                                                                                            | <i>Oestrus ovis</i>                |
|                                | Italy    | M |    |                      |                                                                      | Foreign body<br>sensation,<br>pruritus, pain,<br>burning eye                                              |       |                                                                                                                            | <i>Oestrus ovis</i>                |
| Huynh et al.<br>2005 [114]     | USA      | M | 60 |                      | History of<br>palpebral trauma                                       | Pain, eye redness,<br>swelling                                                                            | Right | Upper and lower<br>eyelid edema with<br>erythema and a 1.5<br>mm round<br>ulceration in the<br>external canthal<br>region. | <i>Lucilia<br/>sericata</i>        |
| Verstrynge et<br>al. 2005 [57] | Belgium  | F | 26 | Tourist in<br>Greece |                                                                      | Foreign body<br>sensation, watery<br>eyes                                                                 | Right | Congested<br>conjunctiva,<br>presence of mobile<br>larvae.                                                                 | <i>Oestrus ovis</i>                |
| Miura et al.<br>2005 [53]      | Japan    | M | 72 |                      | Unconscious<br>patient                                               | Presence of<br>larvae                                                                                     | Left  | Conjunctival<br>hyperemia,<br>hemorrhage with<br>discharge                                                                 | <i>Boettcherisca<br/>peregrine</i> |
| Beltran et al.<br>2006 [115]   | Peru     | M | 50 | Fisherman            | Come from cattle-<br>raising areas                                   | Foreign body<br>sensation, eye<br>redness, eyelid<br>edema,<br>photophobia,<br>decreased visual<br>acuity | Left  |                                                                                                                            | <i>Oestrus ovis</i>                |
|                                | Peru     | F | 67 | Laundress            | Come from cattle-<br>raising areas                                   | Foreign body<br>sensation, eye<br>redness, eyelid<br>edema, chemosis,<br>decreased visual<br>acuity       | Right |                                                                                                                            | <i>Oestrus ovis</i>                |
|                                | Peru     | M | 11 | Student              | Come from cattle-<br>raising areas                                   | Foreign body<br>sensation, eye<br>redness, eyelid<br>edema,<br>photophobia                                | Right |                                                                                                                            | <i>Oestrus ovis</i>                |
| Caça et al. 2006<br>[89]       | Turkey   | F | 8  | Farmer's<br>daughter | An ulcerated area<br>on the lateral<br>canthus and<br>zygomatic area | An outgrowth of<br>maggots from the<br>wound around<br>the eye                                            | Right | Lower eyelid and<br>lower palpebral<br>conjunctiva<br>involvement and<br>destruction.                                      | <i>Chrysomya<br/>bezziana</i>      |
| Ali et al. 2006<br>[108]       | Pakistan | F | 49 |                      |                                                                      | Pruritus, eye<br>redness,<br>photophobia                                                                  | Left  | Follicular<br>conjunctivitis,<br>hyperemia, mild<br>visual loss.                                                           | <i>Family<br/>Oestridae</i>        |

|                            |             |   |    |                    |                      |                                                        |                      |                                                                                                     |                           |
|----------------------------|-------------|---|----|--------------------|----------------------|--------------------------------------------------------|----------------------|-----------------------------------------------------------------------------------------------------|---------------------------|
|                            | Pakistan    | M | 19 |                    | Get hit by a fly     | Foreign body sensation, eye redness                    |                      | Presence of mobile larvae                                                                           | <i>Oestrus ovis</i>       |
| Wakamatsu et al. 2006 [93] | Brazil      | M | 11 |                    |                      | Pruritus, pain, edema on the inner cantus              | Right                | Periorbital edema, small erythematous lesion (inner canthus) with a well-defined spot in the center | <i>Dermatobia hominis</i> |
| Bali J et al. 2007 [65]    | India       | M | 50 | Manual laborer     | Trauma to the eyelid | Swelling, ulceration                                   | Eyelid (right lower) | Presence of maggots, preseptal cellulitis, ulceration, induration, bloody discharge                 | No                        |
| Price et al. 2007 [112]    | USA         | F | 5  |                    |                      | Swelling                                               | Eyelid (left upper)  | Eyelid edema and hyperemia, presence of small opening with clear discharge.                         | <i>Dermatobia hominis</i> |
| Misra et al. 2008 [37]     | India       | F | 34 | Housewife          | Get hit by a fly     | Foreign body sensation, watery eyes, eye redness       | Right                | Conjunctival congestion, presence of mobile larvae, eyelid edema                                    | <i>Oestrus ovis</i>       |
|                            | India       | M | 4  |                    |                      |                                                        | Left                 | Presence of a mobile larvae                                                                         | <i>Oestrus ovis</i>       |
|                            | India       | M | 40 | Farmer             | Get hit by a fly     |                                                        | Left                 |                                                                                                     | <i>Oestrus ovis</i>       |
|                            | India       | F | 8  | Student            |                      |                                                        | Left                 |                                                                                                     | <i>Oestrus ovis</i>       |
|                            | India       | F | 15 | Student            | Get hit by a fly     |                                                        | Left                 |                                                                                                     | <i>Oestrus ovis</i>       |
|                            | India       | M | 29 | Pastor             | Get hit by a fly     |                                                        | Right                |                                                                                                     | <i>Oestrus ovis</i>       |
|                            | India       | M | 30 | Farmer             | Get hit by a fly     |                                                        | Right                | Presence of mobile larvae                                                                           | <i>Oestrus ovis</i>       |
|                            | India       | M | 16 | Pastor             | Get hit by a fly     |                                                        | Both eyes            |                                                                                                     | <i>Oestrus ovis</i>       |
|                            | India       | F | 21 | Teacher            |                      |                                                        | Left                 |                                                                                                     | <i>Oestrus ovis</i>       |
|                            | India       | M | 26 | Farmer             | Get hit by a fly     |                                                        | Right                |                                                                                                     | <i>Oestrus ovis</i>       |
|                            | India       | F | 29 | Farmer             | Get hit by a fly     |                                                        | Right                |                                                                                                     | <i>Oestrus ovis</i>       |
|                            | India       | M | 18 | Pastor             |                      |                                                        | Left                 | Presence of mobile larvae                                                                           | <i>Oestrus ovis</i>       |
|                            | India       | F | 56 | Farmer             | Get hit by a fly     |                                                        | Left                 |                                                                                                     | <i>Oestrus ovis</i>       |
| Dunbar et al. 2008 [102]   | Afghanistan | F | 29 | Nurse              | Get hit by a fly     | Foreign body sensation, watery eyes, pain, burning eye |                      | Presence of mobile larvae                                                                           | <i>Oestrus ovis</i>       |
| Eyigör et al. 2008 [91]    | Turkey      | M | 33 | Research Assistant | Contact with sheep   | Mobile foreign body sensation                          | Right                | Presence of mobile larvae                                                                           | <i>Oestrus ovis</i>       |
| Stacey et al. 2008 [106]   | Afghanistan | M | 18 | UK Soldier         |                      | Mobile foreign body sensation, irritation              | Left                 | Presence of mobile larvae, follicular reaction and                                                  | <i>Oestrus ovis</i>       |

|                          |             |   |          |                    |                                                       |                                                                      |                       |  |                                                                                                                                       |                           |
|--------------------------|-------------|---|----------|--------------------|-------------------------------------------------------|----------------------------------------------------------------------|-----------------------|--|---------------------------------------------------------------------------------------------------------------------------------------|---------------------------|
|                          |             |   |          |                    |                                                       |                                                                      |                       |  | diffuse injection of the conjunctiva                                                                                                  |                           |
| Thabit et al. 2008 [88]  | Jordan (32) | M | 65% (32) |                    |                                                       |                                                                      |                       |  | Conjunctival hyperemia, presence of mobile larvae, chemosis, watery eyes, mild to severe conjunctivitis, eyelid edema, pruritus, pain | No                        |
|                          | Jordan (17) | F | 35% (17) | 31.6               |                                                       | Foreign body sensation, watery eyes, pruritus, eye redness, swelling | Right (28), Left (21) |  |                                                                                                                                       |                           |
| Alhady et al. 2008 [54]  | Indonesia   | M | 9        |                    | Co-infestation otomiasis-ophthalmomyiasis             | Red eye                                                              | Right                 |  | A breach in the superonasal bulbar conjunctiva and a live maggot deep in the wound.                                                   | <i>Chrysomya bezziana</i> |
| Kemmanu et al. 2009 [29] | India       | M | 15       | Farmer             | A fly landed on the eye                               | Foreign body sensation                                               | Left                  |  | Conjunctival congestion, sub-conjunctival hemorrhage, mucoid discharge, punctate keratitis.                                           | <i>Oestrus ovis</i>       |
| Thakur et al. 2009 [3]   | India       | F | 17       | Student            | Exposed to a dust storm                               | Foreign body sensation, watery eyes, irritation                      | Right                 |  | Congested conjunctiva, presence of small transparent worms                                                                            | <i>Oestrus ovis</i>       |
| Pandey et al. 2009 [63]  | India       | M | 25       | Farmer             | Something entered the eye while resting under a tree. | Foreign body sensation, watery eyes, burning eye                     | Right                 |  | Congestive conjunctiva, presence of mobile larvae, watery eyes                                                                        | <i>Oestrus ovis</i>       |
| Rivasi et al. 2009 [36]  | Italy       | M | 54       | Office Clerk       | Foreign body sensation while walking                  | Watery eyes, photophobia, irritation                                 | Left                  |  | Conjunctiva hyperemia, watery exudate, presence of small transparent bodies.                                                          | <i>Oestrus ovis</i>       |
| Jenzeri et al. 2009 [39] | Tunisia     | M | 77       | Farmer             |                                                       | Foreign body sensation, eye redness, pain, photophobia               | Right                 |  | Congested conjunctiva, presence of mobile larvae, diffuse stromal corneal edema, various sub-epithelial opacities                     | <i>Oestrus ovis</i>       |
| Cucera et al. 2009 [99]  | Germany     | M | 30       | Tourist in Corsica | Contact with flies                                    | Foreign body sensation, watery eyes, eye redness, swelling (eyelids) | Left                  |  | Conjunctival hyperemia and congestion, presence of mobile larvae, chemosis, palpebral edema                                           | <i>Oestrus ovis</i>       |
|                          | Germany     | F | 30       | Tourist in Corsica | Contact with flies                                    | Foreign body sensation, watery                                       | Left                  |  | Conjunctival hyperemia and congestion,                                                                                                | <i>Oestrus ovis</i>       |

|                          |         |   |    |            |                  |                                                                     |       |                                                                                |                     |
|--------------------------|---------|---|----|------------|------------------|---------------------------------------------------------------------|-------|--------------------------------------------------------------------------------|---------------------|
|                          |         |   |    |            |                  | eyes, eye redness,<br>swelling (eyelids)                            |       | presence of mobile<br>larvae, chemosis,<br>palpebral edema                     |                     |
| Kuk et al. 2009<br>[92]  | Turkey  | M | 40 |            | Get hit by a fly | Foreign body<br>sensation, eye<br>redness                           | Right | Presence of mobile<br>larvae, chemosis,<br>cornea with<br>punctate keratitis   | <i>Oestrus ovis</i> |
| Abuelhssan<br>2010 [146] | Oman    | M | 9  |            | Get hit by a fly | Foreign body<br>sensation, watery<br>eyes                           | Right | Congested<br>conjunctiva,<br>presence of five<br>mobile larvae,<br>watery eyes | <i>Oestrus ovis</i> |
| Anane et al.<br>2010 [1] | Tunisia | M | 6  | Student    | Get hit by a fly | Foreign body<br>sensation, watery<br>eyes, pruritus,<br>photophobia |       | Conjunctival<br>hyperemia,<br>presence of mobile<br>larvae                     | <i>Oestrus ovis</i> |
|                          | Tunisia | M | 30 | Technician | Get hit by a fly | Foreign body<br>sensation, watery<br>eyes, pruritus,<br>photophobia |       | Conjunctival<br>hyperemia,<br>presence of mobile<br>larvae                     | <i>Oestrus ovis</i> |
|                          | Tunisia | M | 63 | Retiree    | Get hit by a fly | Foreign body<br>sensation, watery<br>eyes, pruritus,<br>photophobia |       | Conjunctival<br>hyperemia,<br>presence of mobile<br>larvae                     | <i>Oestrus ovis</i> |
|                          | Tunisia | M | 20 | Worker     | Get hit by a fly | Foreign body<br>sensation, watery<br>eyes, pruritus,<br>photophobia |       | Conjunctival<br>hyperemia,<br>presence of mobile<br>larvae                     | <i>Oestrus ovis</i> |
|                          | Tunisia | F | 17 | Student    | Get hit by a fly | Foreign body<br>sensation, watery<br>eyes, pruritus,<br>photophobia |       | Conjunctival<br>hyperemia,<br>presence of mobile<br>larvae                     | <i>Oestrus ovis</i> |
|                          | Tunisia | M | 41 | Banker     | Get hit by a fly | Foreign body<br>sensation, watery<br>eyes, pruritus,<br>photophobia |       | Conjunctival<br>hyperemia,<br>presence of mobile<br>larvae                     | <i>Oestrus ovis</i> |
|                          | Tunisia | M | 34 | Merchant   | Get hit by a fly | Foreign body<br>sensation, watery<br>eyes, pruritus,<br>photophobia |       | Conjunctival<br>hyperemia,<br>presence of mobile<br>larvae                     | <i>Oestrus ovis</i> |
|                          | Tunisia | M | 16 | Artisan    | Get hit by a fly | Foreign body<br>sensation, watery<br>eyes, pruritus,<br>photophobia |       | Presence of mobile<br>larvae, chemosis                                         | <i>Oestrus ovis</i> |
|                          | Tunisia | M | 8  | Student    | Get hit by a fly | Foreign body<br>sensation, watery<br>eyes, pruritus,<br>photophobia |       | Conjunctival<br>hyperemia,<br>presence of mobile<br>larvae                     | <i>Oestrus ovis</i> |
|                          | Tunisia | F | 45 | Housewife  | Get hit by a fly | Foreign body<br>sensation, watery<br>eyes, pruritus,<br>photophobia |       | Presence of mobile<br>larvae, chemosis                                         | <i>Oestrus ovis</i> |

[illegible]

|                                  |        |   |    |           |                               |                                                            |           |                                                                                       |                     |
|----------------------------------|--------|---|----|-----------|-------------------------------|------------------------------------------------------------|-----------|---------------------------------------------------------------------------------------|---------------------|
|                                  | Libya  | M |    |           | Insect flying around the face | Eye redness                                                |           | Presence of larvae                                                                    | <i>Oestrus ovis</i> |
|                                  | Libya  | M |    |           | Insect flying around the face | Eye redness                                                |           | Presence of larvae                                                                    | <i>Oestrus ovis</i> |
|                                  | Libya  | M |    |           | Insect flying around the face | Eye redness                                                |           | Presence of larvae                                                                    | <i>Oestrus ovis</i> |
|                                  | Libya  | M |    |           | Insect flying around the face | Eye redness                                                |           | Presence of larvae                                                                    | <i>Oestrus ovis</i> |
|                                  | Libya  | M |    |           | Insect flying around the face | Eye redness                                                |           | Presence of larvae                                                                    | <i>Oestrus ovis</i> |
|                                  | Libya  | M |    |           | Insect flying around the face | Eye redness                                                |           | Presence of larvae                                                                    | <i>Oestrus ovis</i> |
|                                  | Libya  | M |    |           | Insect flying around the face | Eye redness                                                |           | Presence of larvae                                                                    | <i>Oestrus ovis</i> |
|                                  | Libya  | M |    |           | Insect flying around the face | Eye redness                                                |           | Presence of larvae                                                                    | <i>Oestrus ovis</i> |
|                                  | Libya  | M |    |           | Insect flying around the face | Eye redness                                                |           | Presence of larvae                                                                    | <i>Oestrus ovis</i> |
| Yar et al. 2011 [90]             | Turkey | F | 43 |           |                               | Foreign body sensation, pruritus, eye redness, pain        | Right     | Conjunctival hyperemia, presence of mobile larvae, eyelid edema and hyperemia (right) | <i>Oestrus ovis</i> |
|                                  | Turkey | M | 21 |           |                               | Eye redness, eye burning                                   | Right     | Conjunctival hyperemia, presence of mobile larvae                                     | <i>Oestrus ovis</i> |
| Ramirez-Miranda et al. 2011 [19] | Mexico | M | 40 |           | Something hit in the face     | Foreign body sensation, watery eyes, pruritus, eye redness | Both eyes | Presence of a mobile larvae                                                           | <i>Oestrus ovis</i> |
| Chakraborti et al. 2011 [67]     | India  | M | 35 | Merchant  | Living with animals           | Pruritus, burning eye                                      | Left      | Conjunctival congestion, presence of mobile larvae                                    | <i>Oestrus ovis</i> |
|                                  | India  | M | 24 | Shoemaker | Living with animals           | Watery eyes, eye redness, irritation                       | Left      | Conjunctival congestion, presence of mobile larvae                                    | <i>Oestrus ovis</i> |
| Singh et al. 2012 [27]           | India  | M | 11 |           |                               | Foreign body sensation, watery eyes, pruritus              | Both eyes | Conjunctival hyperemia, presence of mobile larvae, chemosis, palpebral edema          | <i>Oestrus ovis</i> |
|                                  | India  | M | 45 | Farmer    |                               | Foreign body sensation, watery eyes, pruritus              | Right     | Conjunctival hyperemia, presence of mobile larvae, chemosis, palpebral edema          | <i>Oestrus ovis</i> |
|                                  | India  | M | 25 | Farmer    |                               | Foreign body sensation, watery eyes, pruritus              | Right     | Conjunctival hyperemia, presence of mobile                                            | <i>Oestrus ovis</i> |



|                                   |        |   |    |            |                                               |                                                                         |      |                                                                                                 |                     |
|-----------------------------------|--------|---|----|------------|-----------------------------------------------|-------------------------------------------------------------------------|------|-------------------------------------------------------------------------------------------------|---------------------|
|                                   |        |   |    |            |                                               |                                                                         |      | larvae, chemosis,<br>palpebral edema                                                            |                     |
| Shankar et al.<br>2012 [62]       | India  | M | 50 | Farmer     | Something<br>entered the eye<br>while working | Foreign body<br>sensation, watery<br>eyes, eye redness,<br>pain         | Left | Congested<br>conjunctiva,<br>presence of mobile<br>larvae, watery eyes                          | <i>Oestrus ovis</i> |
| Vijayalekshmi<br>et al. 2013 [79] | India  | F | 25 | Veterinary | Something<br>entered the eye                  | Foreign body<br>sensation, watery<br>eyes, burning eye                  | Left | Congested<br>conjunctiva,<br>watery eyes                                                        | <i>Oestrus ovis</i> |
| Akdemir et al.<br>2013 [26]       | Turkey | F | 18 |            |                                               | Foreign body<br>sensation, watery<br>eyes, eyelid<br>edema.             |      | Conjunctival<br>hyperemia,<br>chemosis, eyelid<br>edema, sub-<br>conjunctival<br>hemorrhage.    | <i>Oestrus ovis</i> |
|                                   | Turkey | F | 23 |            | Exposure to flies                             | Foreign body<br>sensation, watery<br>eyes, eye redness                  |      | Conjunctival<br>hyperemia                                                                       | <i>Oestrus ovis</i> |
|                                   | Turkey | M | 12 |            |                                               | Foreign body<br>sensation, watery<br>eyes, eye redness                  |      | Conjunctival<br>hyperemia,<br>chemosis                                                          | <i>Oestrus ovis</i> |
|                                   | Turkey | F | 45 |            | Exposure to flies                             | Foreign body<br>sensation, watery<br>eyes, eye redness                  |      | Conjunctival<br>hyperemia,<br>chemosis                                                          | <i>Oestrus ovis</i> |
|                                   | Turkey | M | 61 |            | Exposure to flies                             | Foreign body<br>sensation, watery<br>eyes, eye redness,<br>eyelid edema |      | Conjunctival<br>hyperemia,<br>chemosis,<br>palpebral edema.                                     | <i>Oestrus ovis</i> |
|                                   | Turkey | M | 28 |            | Exposure to flies                             | Foreign body<br>sensation, watery<br>eyes, eye redness,<br>eyelid edema |      | Conjunctival<br>hyperemia,<br>chemosis,<br>palpebral edema,<br>punctate epithelial<br>erosions. | <i>Oestrus ovis</i> |
|                                   | Turkey | M | 17 |            |                                               | Foreign body<br>sensation, watery<br>eyes, eye redness                  |      | Conjunctival<br>hyperemia,<br>chemosis                                                          | <i>Oestrus ovis</i> |
|                                   | Turkey | M | 13 |            |                                               | Foreign body<br>sensation, watery<br>eyes, eye redness                  |      | Conjunctival<br>hyperemia,<br>chemosis                                                          | <i>Oestrus ovis</i> |
|                                   | Turkey | F | 15 |            | Exposure to flies                             | Foreign body<br>sensation, watery<br>eyes, eye redness,<br>eyelid edema |      | Conjunctival<br>hyperemia,<br>chemosis,<br>palpebral edema,<br>punctate epithelial<br>erosions  | <i>Oestrus ovis</i> |
|                                   | Turkey | F | 48 |            | Exposure to flies                             | Foreign body<br>sensation, watery<br>eyes, eye redness,<br>eyelid edema |      | Conjunctival<br>hyperemia,<br>chemosis, eyelid<br>edema.                                        | <i>Oestrus ovis</i> |

|                                |        |   |    |                     |                                                                  |                                                                         |                                                                                                       |
|--------------------------------|--------|---|----|---------------------|------------------------------------------------------------------|-------------------------------------------------------------------------|-------------------------------------------------------------------------------------------------------|
| Sucilathangam et al. 2013 [38] | India  | M | 25 | Farmer              | Foreign body sensation, watery eyes, pruritus                    | Conjunctival hyperemia, watery eyes, eyelid edema, chemosis, rhinorrhea | <i>Oestrus ovis</i>                                                                                   |
|                                | India  | M | 28 | Farmer              | Foreign body sensation, watery eyes, pruritus, pain              | Conjunctival hyperemia, chemosis, eyelid edema, watery eyes             | <i>Oestrus ovis</i>                                                                                   |
|                                | India  | M | 42 | Farmer              | Foreign body sensation, pruritus, pain, burning eye              | Chemosis, watery eyes, eyelid edema                                     | <i>Oestrus ovis</i>                                                                                   |
|                                | India  | M | 47 | Farmer              | Foreign body sensation, watery eyes, pruritus, burning eye       | Conjunctival hyperemia, chemosis, watery eyes, palpebral edema          | <i>Oestrus ovis</i>                                                                                   |
|                                | India  | M | 35 | Farmer              | Foreign body sensation, watery eyes, pruritus                    | Conjunctival hyperemia, chemosis, watery eyes, palpebral edema          | <i>Oestrus ovis</i>                                                                                   |
|                                | India  | M | 25 | Farmer              | Foreign body sensation, watery eyes, pruritus, burning eye       | Conjunctival hyperemia, chemosis, eyelid edema, rhinorrhea              | <i>Oestrus ovis</i>                                                                                   |
|                                | India  | F | 30 | Farmer              | Foreign body sensation, watery eyes, pruritus, burning eye       | Conjunctival hyperemia, chemosis, watery eyes, palpebral edema          | <i>Oestrus ovis</i>                                                                                   |
|                                | India  | M | 65 | Farmer              | Foreign body sensation, watery eyes, pruritus, pain, burning eye | Conjunctival hyperemia, chemosis, watery eyes, palpebral edema          | <i>Oestrus ovis</i>                                                                                   |
|                                | India  | M | 35 | Farmer              | Foreign body sensation, watery eyes, pruritus, pain, burning eye | Conjunctival hyperemia, watery eyes, eyelid edema, chemosis, rhinorrhea | <i>Oestrus ovis</i>                                                                                   |
|                                | India  | F | 26 | Farmer              | Foreign body sensation, pruritus, pain, burning eye              | Conjunctival hyperemia, chemosis, watery eyes, eyelid edema             | <i>Oestrus ovis</i>                                                                                   |
| Graffi et al. 2013 [128]       | Israel | M | 91 | Elderly handicapped | Patient hospitalized with underlying disease                     | Both eyes                                                               | Congested conjunctiva, presence of a mobile larvae in both cul-de-sacs, <i>Sarcophaga argyrostoma</i> |

|                               |              |   |    |                                       |                                                                      |                                                                                             |       |                                                                                                                                                               |                              |
|-------------------------------|--------------|---|----|---------------------------------------|----------------------------------------------------------------------|---------------------------------------------------------------------------------------------|-------|---------------------------------------------------------------------------------------------------------------------------------------------------------------|------------------------------|
| Taormina et al.<br>2013 [111] | USA          | F | 1  |                                       |                                                                      | Eye redness,<br>swelling in the<br>periorbital region                                       | Left  | mucopurulent<br>discharge.                                                                                                                                    | <i>Dermatobi<br/>hominis</i> |
|                               |              |   |    |                                       |                                                                      |                                                                                             |       | Eyelid edema,<br>erythema, and<br>edema (upper and<br>lower) with a<br>punctate sinus tract<br>in the upper eyelid<br>draining<br>serosanguinous<br>material. |                              |
| Tomy et al.<br>2013 [13]      | India        | M | 70 | Elderly with<br>underlying<br>disease | Involvement of<br>periorbital tissues<br>due to malignant<br>disease | Presence of foul-<br>smelling ulcers in<br>the wall of the<br>eye, riddled with<br>maggots. | Right | Eyelids thickened<br>and inflamed,<br>ulcerative cavities<br>filled with<br>maggots, exposure<br>keratitis.                                                   | <i>Musca<br/>domestica</i>   |
| Choudhary et<br>al. 2013 [77] | India        | F | 16 |                                       | Ram piece injury.                                                    | Foreign body<br>sensation, watery<br>eyes, mild<br>conjunctivitis                           |       | Presence of larvae,<br>conjunctivitis                                                                                                                         | <i>Oestrus ovis</i>          |
|                               | India        | F | 14 |                                       | Get hit by a fly                                                     | Foreign body<br>sensation, watery<br>eyes, pruritus                                         |       | Presence of larvae,<br>conjunctivitis<br>(mild) with mucoid<br>discharge                                                                                      | <i>Oestrus ovis</i>          |
|                               | India        | F | 18 | Peasant                               | Foreign body<br>sensation while<br>working                           | Foreign body<br>sensation, watery<br>eyes, eye redness                                      |       | Presence of larvae,<br>conjunctivitis<br>(mild)                                                                                                               | <i>Oestrus ovis</i>          |
|                               | India        | M | 65 |                                       | Get hit by a fly                                                     | Watery eyes, eye<br>redness, pain,<br>mucopurulent<br>discharge                             |       | Presence of larvae,<br>chemosis,<br>congestion,<br>punctate sub-<br>conjunctival<br>hemorrhages                                                               | <i>Oestrus ovis</i>          |
|                               | India        | F | 16 |                                       | Get hit by a fly                                                     | Foreign body<br>sensation, eye<br>redness, pain                                             |       | Presence of larvae,<br>conjunctivitis<br>(mild)                                                                                                               | <i>Oestrus ovis</i>          |
|                               | India        | F | 25 | Peasant                               | Foreign body<br>sensation while<br>working                           | Foreign body<br>sensation, watery<br>eyes, eye redness                                      |       | Presence of larvae,<br>conjunctivitis                                                                                                                         | <i>Oestrus ovis</i>          |
|                               | India        | F | 18 |                                       | Get hit by a fly                                                     | Watery eyes, eye<br>redness, pain                                                           |       | Presence of larvae,<br>conjunctivitis                                                                                                                         | <i>Oestrus ovis</i>          |
|                               | India        | F | 18 |                                       | Get hit by a fly                                                     | Watery eyes, eye<br>redness, pain                                                           |       | Presence of larvae,<br>conjunctivitis                                                                                                                         | <i>Oestrus ovis</i>          |
| Carrillo et al.<br>2013 [109] | Spain        | M | 26 | Hiker                                 | Get hit by a fly                                                     | Foreign body<br>sensation                                                                   | Left  | Presence of larvae                                                                                                                                            | <i>Oestrus ovis</i>          |
|                               | Spain        | M | 34 |                                       | Get hit by a fly                                                     | Watery eyes,<br>pruritus                                                                    | Right | Presence of larvae<br>in the conjunctival<br>fornix                                                                                                           | <i>Oestrus ovis</i>          |
|                               | Spain        | M | 22 |                                       |                                                                      | Mobile foreign<br>body sensation,<br>eye redness                                            | Left  | Presence of larvae<br>in the conjunctival<br>fornix                                                                                                           | <i>Oestrus ovis</i>          |
| Pather et al.<br>2013 [51]    | South Africa | M | 30 | Construction<br>worker                |                                                                      | Eye redness, pain                                                                           | Left  | Conjunctival<br>hyperemia,                                                                                                                                    | <i>Oestrus ovis</i>          |

|                                   |      |   |                                       |                                                     |                                                            |                                                                              |                     |
|-----------------------------------|------|---|---------------------------------------|-----------------------------------------------------|------------------------------------------------------------|------------------------------------------------------------------------------|---------------------|
| Gholamhossein<br>et al. 2013 [40] |      |   |                                       |                                                     |                                                            | presence of mobile<br>larvae, chemosis                                       |                     |
|                                   | Iran | M | Farmer<br>living in a<br>rural region | Travel to desert<br>regions or living<br>with sheep | Foreign body<br>sensation, eye<br>redness, eyelid<br>edema | Conjunctival<br>hyperemia,<br>palpebral edema                                | <i>Oestrus ovis</i> |
|                                   | Iran | M | Farmer<br>living in a<br>rural region | Travel to desert<br>regions or living<br>with sheep | Foreign body<br>sensation, eye<br>redness, eyelid<br>edema | Conjunctival<br>hyperemia,<br>palpebral edema                                | <i>Oestrus ovis</i> |
|                                   | Iran | M | Farmer<br>living in a<br>rural region | Travel to desert<br>regions or living<br>with sheep | Foreign body<br>sensation, eye<br>redness, eyelid<br>edema | Conjunctival<br>hyperemia,<br>palpebral edema                                | <i>Oestrus ovis</i> |
|                                   | Iran | M | Farmer<br>living in a<br>rural region | Travel to desert<br>regions or living<br>with sheep | Foreign body<br>sensation, eye<br>redness, eyelid<br>edema | Conjunctival<br>hyperemia,<br>chemosis, a viscous<br>pattern of<br>discharge | <i>Oestrus ovis</i> |
|                                   | Iran | M | Farmer<br>living in a<br>rural region | Travel to desert<br>regions or living<br>with sheep | Foreign body<br>sensation, eye<br>redness, eyelid<br>edema | Conjunctival<br>hyperemia,<br>chemosis, a viscous<br>pattern of<br>discharge | <i>Oestrus ovis</i> |
|                                   | Iran | M | Farmer<br>living in a<br>rural region | Travel to desert<br>regions or living<br>with sheep | Foreign body<br>sensation, eye<br>redness, eyelid<br>edema | Conjunctival<br>hyperemia,<br>chemosis, a viscous<br>pattern of<br>discharge | <i>Oestrus ovis</i> |
|                                   | Iran | M | Farmer<br>living in a<br>rural region | Travel to desert<br>regions or living<br>with sheep | Foreign body<br>sensation, eye<br>redness, eyelid<br>edema | Conjunctival<br>hyperemia,<br>chemosis, a viscous<br>pattern of<br>discharge | <i>Oestrus ovis</i> |
|                                   | Iran | M | Farmer<br>living in a<br>rural region | Travel to desert<br>regions or living<br>with sheep | Foreign body<br>sensation, eye<br>redness, eyelid<br>edema | Conjunctival<br>hyperemia,<br>chemosis, a viscous<br>pattern of<br>discharge | <i>Oestrus ovis</i> |
|                                   | Iran | M | Farmer<br>living in a<br>rural region | Travel to desert<br>regions or living<br>with sheep | Foreign body<br>sensation, eye<br>redness, eyelid<br>edema | Conjunctival<br>hyperemia,<br>chemosis, a viscous<br>pattern of<br>discharge | <i>Oestrus ovis</i> |
|                                   | Iran | M | Farmer<br>living in a<br>rural region | Travel to desert<br>regions or living<br>with sheep | Foreign body<br>sensation, eye<br>redness, eyelid<br>edema | Conjunctival<br>hyperemia,<br>chemosis, a viscous                            | <i>Oestrus ovis</i> |

|                         |        |   |    |                                 |                                               |                                                   |                     |                                                                            |                     |
|-------------------------|--------|---|----|---------------------------------|-----------------------------------------------|---------------------------------------------------|---------------------|----------------------------------------------------------------------------|---------------------|
|                         |        |   |    |                                 |                                               | redness, eyelid edema                             |                     | pattern of discharge                                                       |                     |
|                         | Iran   | M |    | Farmer living in a rural region | Travel to desert regions or living with sheep | Foreign body sensation, eye redness, eyelid edema |                     | Conjunctival hyperemia, chemosis, a viscous pattern of discharge           | <i>Oestrus ovis</i> |
|                         | Iran   | M |    | Farmer living in a rural region | Travel to desert regions or living with sheep | Foreign body sensation, eye redness, eyelid edema |                     | Conjunctival hyperemia, chemosis, a viscous pattern of discharge           | <i>Oestrus ovis</i> |
|                         | Iran   | M |    | Farmer living in a rural region | Travel to desert regions or living with sheep | Foreign body sensation, eye redness, eyelid edema |                     | Conjunctival hyperemia, chemosis, a viscous pattern of discharge           | <i>Oestrus ovis</i> |
|                         | Iran   | M |    | Farmer living in a rural region | Travel to desert regions or living with sheep | Foreign body sensation, eye redness, eyelid edema |                     | Conjunctival hyperemia, chemosis, a viscous pattern of discharge           | <i>Oestrus ovis</i> |
|                         | Iran   | M |    | Farmer living in a rural region | Travel to desert regions or living with sheep | Foreign body sensation, eye redness, eyelid edema |                     | Conjunctival hyperemia, chemosis, a viscous pattern of discharge           | <i>Oestrus ovis</i> |
|                         | Iran   | M |    | Farmer living in a rural region | Travel to desert regions or living with sheep | Foreign body sensation, eye redness, eyelid edema |                     | Conjunctival hyperemia, chemosis, a viscous pattern of discharge           | <i>Oestrus ovis</i> |
|                         | Iran   | M |    | Farmer living in a rural region | Travel to desert regions or living with sheep | Foreign body sensation, eye redness, eyelid edema |                     | Conjunctival hyperemia, chemosis, a viscous pattern of discharge           | <i>Oestrus ovis</i> |
| Neimer et al. 2014 [31] | Israel | M | 27 |                                 | Get hit by an insect                          | Watery eyes, pain, eye burning                    | Left                | Hyperemia, swollen and erythematous palpebral, watery eyes                 | <i>Oestrus ovis</i> |
|                         | Israel | M | 17 |                                 | Get hit by a fly (face)                       | Mobile foreign body sensation, irritation         | Left                | Hyperemia, swollen and erythematous palpebral, watery eyes                 | <i>Oestrus ovis</i> |
| Ranjan et al. 2014 [34] | Oman   | M | 72 | Homeless person                 | Trauma to the eyelid                          | Pain, ulceration, discomfort                      | Eyelid (left upper) | Ulceration, erythema, and edema of the periorbital tissues, necrosis upper | No                  |

|                                  |              |   |    |                        |                                                      |                                                              |           |                                                                                                 |                         |
|----------------------------------|--------------|---|----|------------------------|------------------------------------------------------|--------------------------------------------------------------|-----------|-------------------------------------------------------------------------------------------------|-------------------------|
|                                  |              |   |    |                        |                                                      |                                                              |           | eyelid with numerous maggots.                                                                   |                         |
| Istek 2014 [68]                  | Turkey       | M | 30 | Farmer                 | Contact with sheep                                   | Foreign body sensation                                       | Right     | Conjunctival hyperemia, presence of mobile larvae, serous discharge                             | <i>Oestrus ovis</i>     |
|                                  | Turkey       | F | 26 |                        | A fly landed on the eye                              | Mobile foreign body sensation                                | Right     | Conjunctival hyperemia, presence of mobile larvae, mucopurulent discharge, palpebral cellulitis | <i>Oestrus ovis</i>     |
|                                  | Turkey       | M | 10 | Farmer                 | A fly landed on the eye                              | Red eye                                                      |           | Presence of mobile larvae in the lacrimal meniscus                                              | <i>Oestrus ovis</i>     |
| Kalezic et al. 2014 [158]        | Serbia       | F | 87 | Disabled elderly woman | Severe neurological damage with predisposing factors |                                                              | Left      | Presence of larvae on the conjunctival surface                                                  | <i>Lucilia sericata</i> |
| Akçakaya et al. 2014 [25]        | Turkey       | M | 17 | Student                | A fly landed on the eye                              | Mobile foreign body sensation, watery eyes, pain, irritation | Left      | Conjunctival hyperemia, presence of mobile larvae, eyelid edema (left)                          | <i>Oestrus ovis</i>     |
| Çalışkan et al. 2014 [28]        | Turkey       | M | 17 |                        |                                                      | Watery eyes, pruritus, eye redness                           | Both eyes | Conjunctival hyperemia, presence of mobile larvae, eyelid edema (bilateral)                     | <i>Oestrus ovis</i>     |
|                                  | Turkey       | F | 25 |                        | Get hit by a fly                                     | Foreign body sensation, watery eyes                          | Both eyes | Conjunctival hyperemia, presence of mobile larvae, bilateral conjunctival congestion            | <i>Oestrus ovis</i>     |
|                                  | Turkey       | M | 31 | Merchant               | Get hit by a fly                                     | Foreign body sensation, watery eyes                          | Both eyes | Presence of mobile larva, chemosis (bilateral)                                                  | <i>Oestrus ovis</i>     |
| Al-Amry et al. 2014 [147]        | Saudi Arabia | M | 50 |                        | Went through a sheep farming area                    | Mobile foreign body sensation, watery eyes, eye redness      | Right     | Conjunctival chemosis, presence of mobile larvae                                                | <i>Oestrus ovis</i>     |
| Garcia-Guerrero et al. 2014 [20] | Mexico       | F | 16 | Student                | Get hit by an insect                                 | Foreign body sensation, eye redness, pain                    | Left      | Congested conjunctivitis, presence of mobile larvae                                             | <i>Oestrus ovis</i>     |

|                                      |                        |   |    |         |                                                            |                                                        |       |                                                                                                  |                         |
|--------------------------------------|------------------------|---|----|---------|------------------------------------------------------------|--------------------------------------------------------|-------|--------------------------------------------------------------------------------------------------|-------------------------|
| Murga 2014 [61]                      | Bolivia                | F | 35 |         | Something entered the eye                                  | Mobile foreign body sensation, pruritus                | Left  | Presence of mobile larvae                                                                        | <i>Oestrus ovis</i>     |
| Alameri 2014 [42]                    | Jordan                 | M | 25 | Farmer  | Foreign body sensation                                     | Foreign body sensation, pain, irritation               | Right | Presence of mobile larvae, watery eyes, palpebral edema and hyperemia                            | <i>Oestrus ovis</i>     |
| Bonzon et al. 2015 [110]             | France                 | F | 45 | Teacher | Get hit by a fly                                           | Pruritus, irritation                                   | Right | Presence of larvae                                                                               | <i>Oestrus ovis</i>     |
|                                      | France                 | F | 67 | Farmer  | Get hit by an insect                                       | Pain                                                   |       |                                                                                                  | <i>Oestrus ovis</i>     |
|                                      | France                 | F | 43 | Nurse   | Trauma to the eye (fly)                                    | Foreign body sensation                                 |       |                                                                                                  | <i>Oestrus ovis</i>     |
|                                      | France                 | M | 28 | Mason   | Trauma to the eye.                                         | Pain                                                   | Left  |                                                                                                  | <i>Oestrus ovis</i>     |
| Dokur et al. 2015 [72]               | Turkey                 | M | 57 |         |                                                            | Pruritus, eye redness                                  | Left  | Conjunctival hyperemia, presence of mobile larvae                                                | <i>Oestrus ovis</i>     |
| Choi et al. 2015 [24]                | South Korea            | M | 72 | Farmer  | No predisposing factors                                    | Foreign body sensation, watery eyes, eye redness, pain | Left  | Left periorbital edema, erythema of the left eyelid, and small larvae in the conjunctival pouch. | <i>Lucilia sericata</i> |
| Berrozpe-Villabona et al. 2015 [137] | Spain                  | M | 50 | Tourist | Went on vacation to a rural area                           | Mobile foreign body sensation, watery eyes, pruritus   | Left  | Presence of mobile larvae, watery eyes, congested bulbar conjunctiva                             | <i>Oestrus ovis</i>     |
| Sundu et al. 2015 [69]               | Turkey                 | M | 13 |         | Foreign body hit the eye while passing by a flock of sheep | Watery eyes, pruritus, eyelid edema                    | Left  | Presence of mobile larvae in the palpebral conjunctiva                                           | <i>Oestrus ovis</i>     |
|                                      | Turkey                 | M | 21 |         | Foreign body hit the eye                                   | Watery eyes, eye redness, blurred vision               | Right | Presence of mobile larvae in the palpebral and bulbar conjunctivae.                              | <i>Oestrus ovis</i>     |
|                                      | Turkey                 | M | 55 | Pastor  | Larvae removed from the eye (a week earlier).              | Watery eyes, eye redness                               | Right | Presence of mobile larvae in the palpebral and bulbar conjunctivae.                              | <i>Oestrus ovis</i>     |
| Santé Fernandez et al. 2015 [148]    | Spain (Canary Islands) | F | 43 |         | Contact with flies                                         | Foreign body sensation, eye redness, pain              | Right | Presence of a mobile larvae                                                                      | <i>Oestrus ovis</i>     |
| Naimer 2015 [32]                     | Israel                 | M | 27 |         | Contact with flies                                         | Watery eyes, pain                                      | Left  | Presence of larvae, watery eyes, eyelid edema and hyperemia                                      | <i>Oestrus ovis</i>     |

|                       |        |   |    |                                |                              |                                                             |       |                                                                                                         |                           |
|-----------------------|--------|---|----|--------------------------------|------------------------------|-------------------------------------------------------------|-------|---------------------------------------------------------------------------------------------------------|---------------------------|
| Nene et al. 2015 [87] | India  | F | 42 | Poverty and chronic alcoholism | A wound in the inner canthus | Pruritus, edema, foul-smelling discharge, presence of worms | Right | Presence of mobile larvae, periorbital edema, conjunctival vascular ingurgitation, inner canthal lesion | <i>Chrysomya bezziana</i> |
| Usta et al. 2015 [43] | Turkey | F | 4  |                                | Dust entered the eye         | Watery eyes, pruritus, eye redness, irritation              | Right | Conjunctival hyperemia, presence of mobile larvae, watery eyes, eyelid edema                            | <i>Oestrus ovis</i>       |
|                       | Turkey | F | 50 | Pastor                         | Get hit by a fly             | Watery eyes, pruritus, eye redness, irritation              | Right | Conjunctival hyperemia, presence of mobile larvae, watery eyes, eyelid edema                            | <i>Oestrus ovis</i>       |
|                       | Turkey | F | 45 | Farmer                         | Get hit by a fly             | Watery eyes, pruritus, eye redness, irritation              | Left  | Conjunctival hyperemia, presence of mobile larvae, watery eyes, eyelid edema                            | <i>Oestrus ovis</i>       |
|                       | Turkey | F | 49 | Pastor                         | Get hit by a fly             | Watery eyes, pruritus, eye redness, irritation              | Right | Conjunctival hyperemia, presence of mobile larvae, watery eyes, eyelid edema                            | <i>Oestrus ovis</i>       |
|                       | Turkey | F | 60 | Farmer                         | Get hit by a fly             | Watery eyes, pruritus, eye redness, irritation              | Right | Conjunctival hyperemia, presence of mobile larvae, watery eyes, eyelid edema                            | <i>Oestrus ovis</i>       |
|                       | Turkey | M | 18 | Student                        | Get hit by something         | Watery eyes, pruritus, eye redness, irritation              | Left  | Conjunctival hyperemia, presence of mobile larvae, watery eyes, eyelid edema                            | <i>Oestrus ovis</i>       |
|                       | Turkey | M | 41 | Worker                         | Get hit by something         | Watery eyes, pruritus, eye redness, irritation              | Right | Conjunctival hyperemia, presence of mobile larvae, watery eyes, eyelid edema                            | <i>Oestrus ovis</i>       |
|                       | Turkey | M | 19 | Student                        | Get hit by something         | Watery eyes, pruritus, eye redness, irritation              | Right | Conjunctival hyperemia, presence of mobile larvae, watery eyes, eyelid edema                            | <i>Oestrus ovis</i>       |
|                       | Turkey | M | 17 | Student                        | Get hit by a fly             | Watery eyes, pruritus, eye redness, irritation              | Right | Conjunctival hyperemia, presence of mobile larvae, watery eyes, eyelid edema                            | <i>Oestrus ovis</i>       |



|                          |         |   |    |                    |                                 |                                                  |                                |                                                                                                                                            |                           |
|--------------------------|---------|---|----|--------------------|---------------------------------|--------------------------------------------------|--------------------------------|--------------------------------------------------------------------------------------------------------------------------------------------|---------------------------|
|                          | Turkey  | F | 33 | Housewife          | Get hit by something            | Watery eyes, pruritus, eye redness, irritation   | Left                           | Conjunctival hyperemia, presence of mobile larvae, watery eyes, eyelid edema                                                               | <i>Oestrus ovis</i>       |
|                          | Turkey  | M | 21 | Student            | Get hit by a fly                | Watery eyes, pruritus, eye redness, irritation   | Left                           | Conjunctival hyperemia, presence of mobile larvae, watery eyes, eyelid edema                                                               | <i>Oestrus ovis</i>       |
|                          | Turkey  | M | 52 | Shopkeeper         | Get hit by a fly                | Watery eyes, pruritus, eye redness, irritation   | Right                          | Conjunctival hyperemia, presence of mobile larvae, watery eyes, eyelid edema                                                               | <i>Oestrus ovis</i>       |
| Vogt et al. 2015 [149]   | Germany | M | 26 | Tourist to Croatia |                                 | Foreign body sensation, pruritus                 | Left                           | Conjunctival hyperemia and congestion, presence of mobile larvae, chemosis                                                                 | <i>Oestrus ovis</i>       |
| Pal et al. 2016 [30]     | India   | F | 36 |                    | Dust entered the eye            | Foreign body sensation, watery eyes, eye redness | Left                           | Bulbar and palpebral conjunctiva hyperemia and tiny mobile white bodies.                                                                   | <i>Oestrus ovis</i>       |
| Alsaif et al. 2016 [130] | USA     | F | 10 |                    | Visit a farm                    | Swelling of the eyelid                           | Eyelid (right upper and lower) | Eyelid edema (right upper and lower), periorbital edema, conjunctival chemosis, cutaneous opening located adjacent to the lateral canthus. | <i>Dermatobia hominis</i> |
| Özyol et al. 2016 [70]   | Turkey  | F | 45 |                    | While cutting fruit from a tree | Foreign body sensation, eye redness, pain        | Right                          | Conjunctival hyperemia, presence of mobile larvae, mucopurulent discharge in the cul-de-sacs                                               | <i>Oestrus ovis</i>       |
|                          | Turkey  | F | 37 |                    | Get hit by a fly                | Foreign body sensation, watery eyes, eye redness | Right                          | Conjunctival hyperemia, presence of mobile larvae, eyelid edema, punctate keratitis                                                        | <i>Oestrus ovis</i>       |
|                          | Turkey  | M | 17 |                    |                                 | Eye redness, pain                                | Right                          | Conjunctival hyperemia, presence of mobile larvae, small                                                                                   | <i>Oestrus ovis</i>       |

|                              |           |   |    |                 |                                                    |                                                                                   |           |                                                                                                       |                         |
|------------------------------|-----------|---|----|-----------------|----------------------------------------------------|-----------------------------------------------------------------------------------|-----------|-------------------------------------------------------------------------------------------------------|-------------------------|
|                              |           |   |    |                 |                                                    |                                                                                   |           | conjunctival hemorrhages                                                                              |                         |
| Albaroudi et al. 2016 [52]   | Morocco   | M | 28 |                 | Contact with flies                                 | Foreign body sensation, watery eyes, pruritus, eye redness                        |           | Conjunctival hyperemia, presence of mobile larvae                                                     | <i>Oestrus ovis</i>     |
| Rizvi et al. 2016 [86]       | India     | M | 60 | Homeless person | History of right eye evisceration one year before. | Painful swelling around the eyes, scalp with discharge, burning eye               | Both eyes | Left eye only with senile cataract                                                                    | <i>Musca domestica</i>  |
| Norouzi et al. 2017 [21]     | Iran      | M | 78 | Farmer          | Previous retinal surgery with predisposing factors | Foreign body sensation, pruritus, pain, eye discharge, presence of worms          | Right     | Conjunctival hyperemia and congestion, presence of mobile larvae, moderate discharge, palpebral edema | <i>Lucilia sericata</i> |
| Sen et al. 2017 [129]        | India     | F | 52 | Farmer          | Something entered the eye                          | Watery eyes, pain, eye burning                                                    | Right     | Congested conjunctiva, presence of mobile larvae, watery eyes                                         | <i>Oestrus ovis</i>     |
|                              | India     | M | 75 | Farmer          | Soil particles hit both eyes                       | Watery eyes, eye redness, pain                                                    | Both eyes | Congested conjunctiva, presence of mobile larvae, watery eyes                                         | <i>Oestrus ovis</i>     |
| Villeda et al. 2017 [60]     | Honduras  | F | 8  |                 |                                                    | Foreign body sensation, eyelid edema, conjunctival hyperemia, yellowish discharge | Left      | Conjunctival hyperemia, presence of mobile larvae, biparpebral edema, purulent discharge              | No                      |
| Jenkins et al. 2018 [48]     | Australia | M | 20 | Tourist         |                                                    | Watery eyes, pain, photophobia                                                    |           | Conjunctival hyperemia, presence of three larvae, corneal abrasion                                    | <i>Oestrus ovis</i>     |
| Gupta et al. 2018 [80]       | India     | M | 38 | Farmer          | Exposure to manure                                 | Foreign body sensation                                                            | Left      | Congested conjunctivae, palpebral edema                                                               | <i>Musca spp.</i>       |
| Basmaciyan et al. 2018 [117] | France    | M | 19 | Farmer          | Trauma to the eye (fly)                            | Mobile foreign body sensation, pain                                               | Right     | Conjunctival hyperemia and congestion, presence of mobile larvae                                      | <i>Oestrus ovis</i>     |
| Velev et al. 2018 [47]       | Bulgaria  | F | 61 |                 | Get hit by an insect                               | Foreign body sensation, watery eyes, conjunctival hyperemia                       | Left      | Conjunctival hemorrhage, presence of three mobile larvae, eyelid edema (lower)                        | <i>Oestrus ovis</i>     |

|                                      |              |   |    |                   |                                                                  |                                                              |       |                                                                                                                   |                           |
|--------------------------------------|--------------|---|----|-------------------|------------------------------------------------------------------|--------------------------------------------------------------|-------|-------------------------------------------------------------------------------------------------------------------|---------------------------|
| Zhang et al. 2018 [49]               | China        | M | 30 | Vehicle Inspector | Foreign body sensation while closing the door of a farm vehicle. | Foreign body sensation, watery eyes, pruritus                | Right | Conjunctival hyperemia, presence of mobile larvae in the tarsal and bulbar conjunctiva., petechial hemorrhages    | <i>Oestrus ovis</i>       |
| Sharma 2018 [150]                    | Saudi Arabia | M | 32 |                   | Exposed to a dust storm                                          | Foreign body sensation, watery eyes, eye redness, rhinorrhea | Left  | Congested conjunctiva, presence of larvae, eyelid edema, photophobia, reduced palpebral aperture                  | <i>Oestrus ovis</i>       |
| Rao et al. 2018 [84]                 | India        | M | 38 |                   | Dust entered the eye                                             | Foreign body sensation, watery eyes, eye redness, pain       | Left  | Congested conjunctiva, presence of mobile larvae, watery eyes                                                     | <i>Oestrus ovis</i>       |
| Serra Moltó et al. 2018 [120]        | Spain        | F | 46 |                   | From Honduras                                                    | Pain, eyelid swelling (upper)                                | Right | Hyperemia of the upper eyelid, solution of continuity of the tarsal conjunctiva, and extrusion of part of a worm. | <i>Dermatobia hominis</i> |
| Tabuenca-del Barrio et al. 2018 [44] | Spain        | F | 39 | Peasant           | Get hit by a fly                                                 | Foreign body sensation                                       | Right | Presence of mobile larvae                                                                                         | <i>Oestrus ovis</i>       |
|                                      | Spain        | M | 57 | Farmer            |                                                                  | Foreign body sensation                                       | Right | Presence of mobile larvae                                                                                         | <i>Oestrus ovis</i>       |
|                                      | Spain        | M | 20 |                   | Get hit by a fly                                                 | Foreign body sensation                                       | Right | Presence of mobile larvae                                                                                         | <i>Oestrus ovis</i>       |
|                                      | Spain        | M | 39 | Farmer            |                                                                  | Foreign body sensation                                       | Right | Presence of mobile larvae in the conjunctival sac fundus.                                                         | <i>Oestrus ovis</i>       |
| Couto Junior et al. 2018 [94]        | Brazil       | M | 44 |                   |                                                                  | Eyelid edema, irritation, discharge secretion                | Right | Presence of mobile larvae, drainage hole in the upper palpebral angle                                             | <i>Dermatobia hominis</i> |
| Armas-Herrera et al. 2018 [151]      | Peru         | M | 14 |                   | Lives in a rural area                                            | Foreign body sensation, pruritus, eye redness, irritation    | Left  | Conjunctival hyperemia, presence of mobile larvae, chemosis                                                       | <i>Oestrus ovis</i>       |
| Ibáñez-Navarro et al. 2018 [152]     | Spain        | M | 56 | Farmer            |                                                                  | Foreign body sensation, pruritus                             | Right | Presence of mobile larvae                                                                                         | No                        |
| Fries et al. 2018 [153]              | Germany      | F | 42 | Tourist to Greece | Contact with sheep                                               | Mobile foreign body sensation, pruritus                      | Left  | Presence of a mobile larva                                                                                        | <i>Oestrus ovis</i>       |

|                                 |                |   |    |                   |                                                      |                                                         |                     |                                                                                                       |                               |
|---------------------------------|----------------|---|----|-------------------|------------------------------------------------------|---------------------------------------------------------|---------------------|-------------------------------------------------------------------------------------------------------|-------------------------------|
| Sudhir et al. 2018 [154]        | India          | F | 28 | Student           | Direct splash                                        | Foreign body sensation, watery eyes, pruritus, pain     | Left                | Multiple larvae in the upper and lower cul-de-sacs                                                    | <i>Oestrus ovis</i>           |
|                                 | India          | M | 24 | Student           | Insect entered the eye                               | Watery eyes, pruritus, photophobia, irritation          | Left                | Multiple larvae in the upper and lower cul-de-sacs                                                    | <i>Oestrus ovis</i>           |
| Gautam et al. 2019 [81]         | India          | F | 26 | Peasant           | Something entered the eye                            | Foreign body sensation, watery eyes, pain, irritation   | Right               | Congested conjunctiva, presence of mobile larvae in the palpebral and bulbar conjunctiva, watery eyes | <i>Oestrus ovis</i>           |
| Jordan et al. 2019 [50]         | Jamaica        | M | 17 | Farmer            | Foreign body sensation                               | Foreign body sensation, pruritus, eye redness, pain     | Left                | Conjunctival congestion, presence of three mobile larvae                                              | <i>Oestrus ovis</i>           |
| D'Assumpcao et al. 2019 [96]    | USA            | M | 16 | Teenager          | History of playing on a field fertilized with manure | Mobile foreign body sensation, eye redness, irritation  | Left                | Conjunctival hyperemia, presence of multiple larvae in bulbar conjunctiva and fornix.                 | <i>Oestrus ovis</i>           |
| Dutta Majumder et al. 2019 [85] | India          | M | 58 |                   |                                                      | Eye redness, irritation                                 | Right               | Presence of mobile larvae, hyperemia of the bulbar and palpebral conjunctiva                          | <i>Oestrus ovis</i>           |
| Mamani-Quispe et al. 2019 [97]  | Peru           | M | 26 | Chef              |                                                      | Foreign body sensation, watery eyes, eye redness        | Left                | Presence of mobile larvae, Mild bulbar conjunctival hyperemia                                         | <i>Oestrus ovis</i>           |
| Can et al. 2020 [71]            | Turkey         | F | 55 | Cattleman         |                                                      | Pruritus, eye redness, burning pain                     | Right               | Conjunctival hyperemia, eyelids edema                                                                 | No                            |
| Gupta et al. 2020 [16]          | India          | M | 52 | Hairdresser       | Something entered the eye                            | Foreign body sensation, eye redness                     | Left                | Conjunctival congestion, chemosis, watery eyes, palpebral edema                                       | <i>Oestrus ovis</i>           |
| Hartmannová et al. 2020 [46]    | Czech Republic | M |    | Tourist in Greece | Sawdust entered the eye                              | Watery eyes, pain                                       | Left                | Presence of larvae, minor erosion of the corneal epithelium, hyper-perfusion of the conjunctiva       | <i>Oestrus ovis</i>           |
| Farias et al. 2020 [11]         | Brazil         | M | 51 | Alcoholic         | Trauma                                               | Pain, erythema, sensation of worms moving in the eyelid | Eyelid (left lower) | An ulcerated lesion with erythematous margins containing numerous larvae                              | <i>Cochliomyia macellaria</i> |

|                                |                     |   |    |                 |                                     |                                                               |                                |                                                                                                                                                                           |                     |
|--------------------------------|---------------------|---|----|-----------------|-------------------------------------|---------------------------------------------------------------|--------------------------------|---------------------------------------------------------------------------------------------------------------------------------------------------------------------------|---------------------|
| Dadaci et al. 2020 [73]        | Turkey              | M | 47 |                 | Attack of a fly while in the garden | Mobile foreign body sensation, pruritus, eye redness          | Right                          | Conjunctival hyperemia, presence of larvae, eyelid edema (upper)                                                                                                          | <i>Oestrus ovis</i> |
| Sen et al. 2020 [82]           | India               | M | 1  |                 | Cohabitation with domestic animals  | Eye redness, edema, ocular discharge, bleeding                | Eyelid (right upper and lower) | Conjunctival congestion, presence of mobile larvae, chemosis, periorbital eyelids edema and hyperemia, hyperemic, tender, and edematous skin in the adjacent facial area. | <i>Oestrus ovis</i> |
| Balamurugan et al. 2020 [83]   | India               | F | 26 | Farmer          | Foreign body entered the eye        | Watery eyes, eye redness, mucopurulent discharge              | Left                           | Presence of larvae                                                                                                                                                        | <i>Oestrus ovis</i> |
| Pupić-Bakrač et al. 2020 [104] | Republic of Croatia | M | 30 | Pastor          | Get hit by a fly                    | Foreign body sensation, eye redness, irritation               | Right                          | Conjunctivitis (severe), presence of mobile larvae, chemosis                                                                                                              | <i>Oestrus ovis</i> |
|                                | Republic of Croatia | F | 76 | Pastor          | Get hit by a fly                    | Eye redness, irritation                                       | Right                          | Congested conjunctiva, presence of a mobile larva, eyelid edema                                                                                                           | <i>Oestrus ovis</i> |
| Kunduracı et al. 2020 [74]     | Turkey              | F | 18 |                 |                                     | Foreign body sensation, watery eyes, eye redness              | Left                           | Multiple mobile larvae, edema and hyperemia of the left eyelid, chemosis,                                                                                                 | <i>Oestrus ovis</i> |
| Jiang et al. 2020 [145]        | USA                 | M | 44 | Homeless person | Multiple predisposing factors       | Pain, headache, blurred vision                                | Right                          | Presence of a mobile larva, chemosis, conjunctivitis, central corneal epithelial defect                                                                                   | No                  |
| Maharjan et al. 2021 [155]     | Nepal               | M | 22 |                 |                                     | Foreign body sensation, watery eyes, eye redness, photophobia | Left                           | Congestive conjunctiva, numerous larvae, watery eyes, eyelid edema                                                                                                        | <i>Oestrus ovis</i> |
|                                | Nepal               | F | 38 |                 | Insect bite in the eye              | Foreign body sensation, redness, eyelid edema                 | Right                          | Congestive conjunctiva, numerous larvae, watery eyes, eyelid edema                                                                                                        | <i>Oestrus ovis</i> |

|                                  |         |   |    |         |                                         |                                                                               |       |                                                                              |                     |
|----------------------------------|---------|---|----|---------|-----------------------------------------|-------------------------------------------------------------------------------|-------|------------------------------------------------------------------------------|---------------------|
| Singh et al.<br>2022 [78]        | India   | M | 45 |         | Foreign body<br>sensation               | Mobile foreign<br>body sensation,<br>irritation                               | Right | Conjunctival<br>congestion,<br>presence of larvae,<br>watery discharge       | <i>Oestrus ovis</i> |
|                                  | India   | M | 32 |         | Foreign body<br>sensation               | Foreign body<br>sensation, watery<br>eyes, pain                               | Right | Conjunctival<br>congestion,<br>presence of larvae,<br>watery discharge       | <i>Oestrus ovis</i> |
|                                  | India   | M | 28 |         | Something strikes<br>the eye            | Foreign body<br>sensation, watery<br>eyes, pain                               | Left  | Conjunctival<br>congestion,<br>presence of larvae,<br>watery discharge       | <i>Oestrus ovis</i> |
| Abihaidar et al.<br>2022 [156]   | France  | M | 53 |         | Lived near a<br>horse and sheep<br>farm | Foreign body<br>sensation                                                     | Right | Conjunctival<br>hyperemia,<br>presence of mobile<br>larvae                   | <i>Oestrus ovis</i> |
| Naujokaitis et<br>al. 2022 [157] | Germany | F | 42 |         | Contact with flies                      | Foreign body<br>sensation, eye<br>redness, burning<br>eye                     | Right | Presence of mobile<br>larvae, conjunctival<br>injection, scanty<br>secretion | <i>Oestrus ovis</i> |
| Tamponi et al.<br>2022 [98]      | Italy   | F | 30 | Tourist | Foreign body<br>entered the eye         | Watery eyes,<br>presence of<br>larvae                                         |       | Conjunctival<br>hyperemia,<br>presence of mobile<br>larvae,<br>blepharospasm | <i>Oestrus ovis</i> |
|                                  | Italy   | F | 32 | Tourist |                                         | Mobile foreign<br>body sensation,<br>watery eyes,<br>pruritus, eye<br>redness |       | Hyperemic<br>conjunctiva,<br>numerous larvae,<br>palpebral edema             | <i>Oestrus ovis</i> |
|                                  | Italy   | F | 17 | Tourist | Direct splash                           | Foreign body<br>sensation, eye<br>burning                                     | Left  | Presence of a<br>mobile larva,<br>moderate<br>conjunctival<br>hyperemia      | <i>Oestrus ovis</i> |
